# Supplementary material
Source: PubMed Central journal article supplement (PMC6085780)
Supplement: tpmd180120.SD1.pdf [file tpmd180120.SD1.pdf]

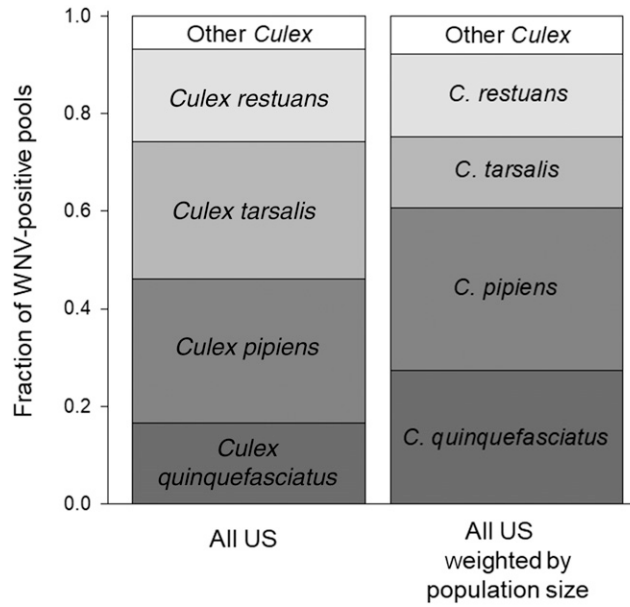

SUPPLEMENTAL FIGURE 1. Relative contribution to West Nile virus (WNV)-infected *Culex* species across the United States (US), 2004–2009. Columns show average fraction of WNV-positive pools attributed to each mosquito species (all US,  $N = 821$ ), shown with and without adjustment for county human population sizes.

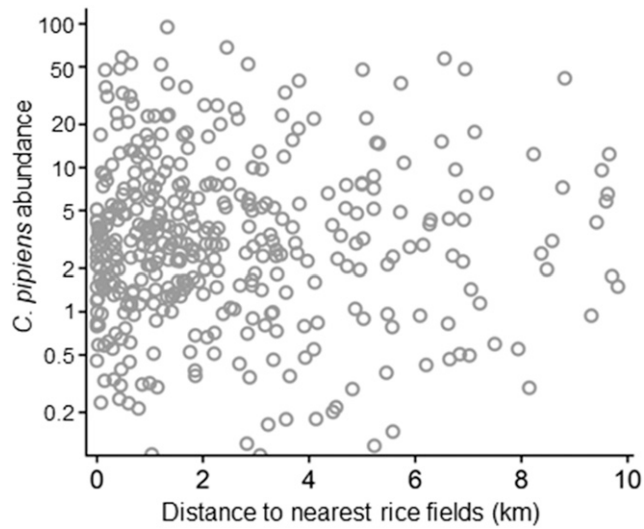

SUPPLEMENTAL FIGURE 2. *Culex pipiens* mosquito abundance and distance to rice fields. *Culex pipiens* abundance (mosquitoes per New Jersey light trap-week) in California between June and September, plotted against distance to nearest rice field ( $N = 388$ ). In contrast to *Culex tarsalis*, we observed no significant relationship ( $P = 0.74$ ) between distance to rice field and abundance of *C. pipiens*.

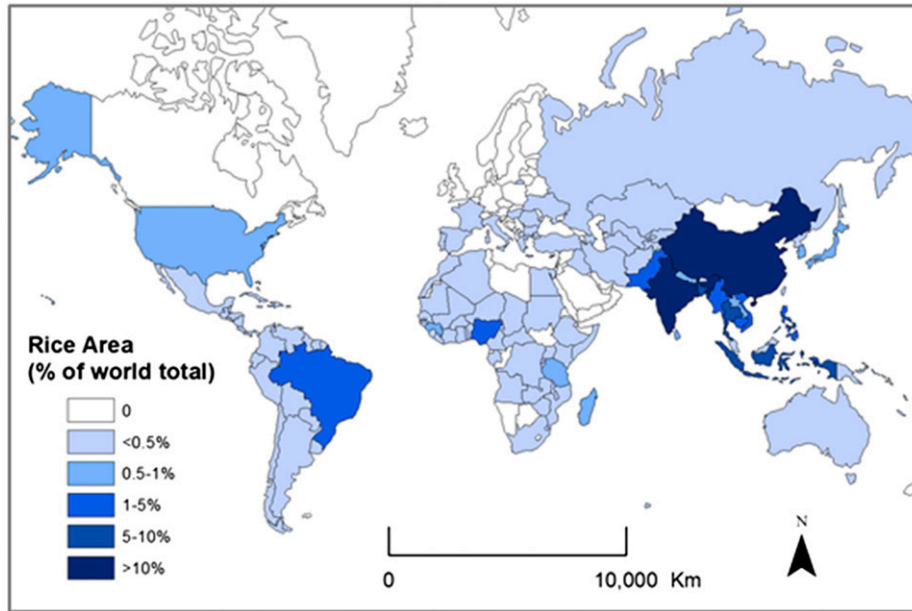

SUPPLEMENTAL FIGURE 3. Rice-growing areas of the world. Map showing the percent contribution of each country to total rice area in the world. Estimated rice area for each country based on mean rice-growing region from years 2010–2014 (Food and Agriculture Organization of the United Nations 2017).

SUPPLEMENTAL TABLE 1

List of predictor and response variables, transformations, and sources

| Variables                  | Transformations                                | Source                                                |
|----------------------------|------------------------------------------------|-------------------------------------------------------|
| WNV incidence              | $\text{Log}_{10}(\text{WNV incidence} + 0.1)$  | CDC cases by county 2004–2015                         |
| Irrigated (not-rice)       | $\text{Log}_{10}(\text{irrigated} + 0.1)$      | USGS MODIS: 2012, 250 m resolution (minus rice areas) |
| Developed                  | $\text{Log}_{10}(\text{developed})$            | Cropland: NASS: 2008–2014, 30 m resolution            |
| Open water                 | $\text{Log}_{10}(\text{open water} + 0.05)$    | Cropland: NASS: 2008–2014, 30 m resolution            |
| Wetland                    | $\text{Log}_{10}(\text{wetland} + 0.05)$       | Cropland: NASS: 2008–2014, 30 m resolution            |
| Forest                     | None                                           | Cropland: NASS: 2008–2014, 30 m resolution            |
| Rice                       | $\text{Log}_{10}(\text{rice})$                 | Cropland: NASS: 2008–2014, 30 m resolution            |
| County area                | Area, used to normalize                        | US Census Bureau: 2010                                |
| Mean rainfall              | $\text{Log}_{10}(\text{rain})$                 | CDC Wonder NLDAS mean 2003–2011                       |
| Mean temperature           | None                                           | CDC Wonder NLDAS mean 2003–2011: 2 m above ground     |
| Human population           | Used to calculate WNV                          | US Census Bureau: 2010                                |
| Mean <i>Culex tarsalis</i> | $\text{Log}_{10}(\text{C. tarsalis mean} + 1)$ | NJLT data 2000–2015, Calsurv vector control data      |

CDC = Centers for Disease Control and Prevention; NASS = National Agricultural Statistics Service; NJLT = New Jersey light trap; NLDAS = North America Land Data Assimilation System; MODIS = moderate resolution imaging spectroradiometer; US = United States; WNV = West Nile virus.

SUPPLEMENTAL TABLE 2

Output from generalized least squares model predicting human West Nile virus incidence on a county scale using land cover and climate predictors across California

| Predictors            | Coefficient/intercept | SE    | P value |
|-----------------------|-----------------------|-------|---------|
| Irrigation (non-rice) | 0.236                 | 0.137 | 0.0943  |
| Developed land        | 0.255                 | 0.214 | 0.2419  |
| Wetland               | -0.304                | 0.150 | 0.0494  |
| Open water            | 0.089                 | 0.146 | 0.5458  |
| Forest                | 0.001                 | 0.006 | 0.9128  |
| Rice fields           | 0.132                 | 0.046 | 0.0072  |
| Mean temperature      | 0.023                 | 0.031 | 0.478   |
| Mean rainfall         | -0.403                | 0.649 | 0.5383  |
| Intercept             | -0.762                | 0.731 | 0.304   |

Model includes exponential spatial autocorrelation,  $N = 46$ .

SUPPLEMENTAL TABLE 3

Output from generalized least squares model predicting human West Nile virus incidence on a county scale using land cover and climate predictors across rice-growing areas in the rest of the US (excluding California)

| Predictors            | Coefficient/intercept | SE       | P value  |
|-----------------------|-----------------------|----------|----------|
| Irrigation (non-rice) | -0.01116              | 0.05282  | 0.8328   |
| Developed land        | 0.534014              | 0.116767 | < 0.0001 |
| Wetland               | 0.035156              | 0.072197 | 0.6266   |
| Open water            | -0.12248              | 0.062228 | 0.0497   |
| Forest                | -0.0026               | 0.002292 | 0.2575   |
| Rice fields           | 0.029085              | 0.025097 | 0.2472   |
| Mean temperature      | 0.009563              | 0.025579 | 0.7087   |
| Mean rainfall         | 0.812468              | 0.775813 | 0.2956   |
| Intercept             | -1.223                | 0.882    | 0.1664   |

US = United States. Model includes exponential spatial autocorrelation,  $N = 413$ .
